# Supplementary material for: Template-free synthesis of hierarchical γ-Al2O3 nanostructures and their adsorption affinity toward phenol and CO2
Source: Royal Society of Chemistry journal article supplement (doi:10.1039/c4ra11329b), 2014-12-17
Supplement: c4ra11329b1.pdf [file c4ra11329b1.pdf]

## Electronic Supplementary Information

# Template-free synthesis of hierarchical $\gamma$ -Al<sub>2</sub>O<sub>3</sub> nanostructures and their adsorption affinity toward phenol and CO<sub>2</sub>

Weiwan Cai,<sup>\*a</sup> Yuzhen Hu,<sup>a</sup> Jiaguo Yu,<sup>b</sup> Wenguang Wang,<sup>b</sup> Jiabin Zhou<sup>c</sup> and Mietek Jaroniec<sup>d</sup>

<sup>a</sup>State Key Laboratory of Silicate Materials for Architectures, School of Chemical Engineering, Wuhan University of Technology, 205 Luoshi Road, Wuhan 430070, P. R. China

<sup>b</sup>State Key Laboratory of Advanced Technology for Material Synthesis and Processing, Wuhan University of Technology, 205 Luoshi Road, Wuhan 430070, P. R. China

<sup>c</sup>School of Resources and Environmental Engineering, Wuhan University of Technology, 122 Luoshi Road, Wuhan 430070, P. R. China

<sup>d</sup>Department of Chemistry and Biochemistry, Kent State University, Kent 44242, Ohio, USA

E-mail: caiwq@whut.edu.cn (W. Q. Cai).

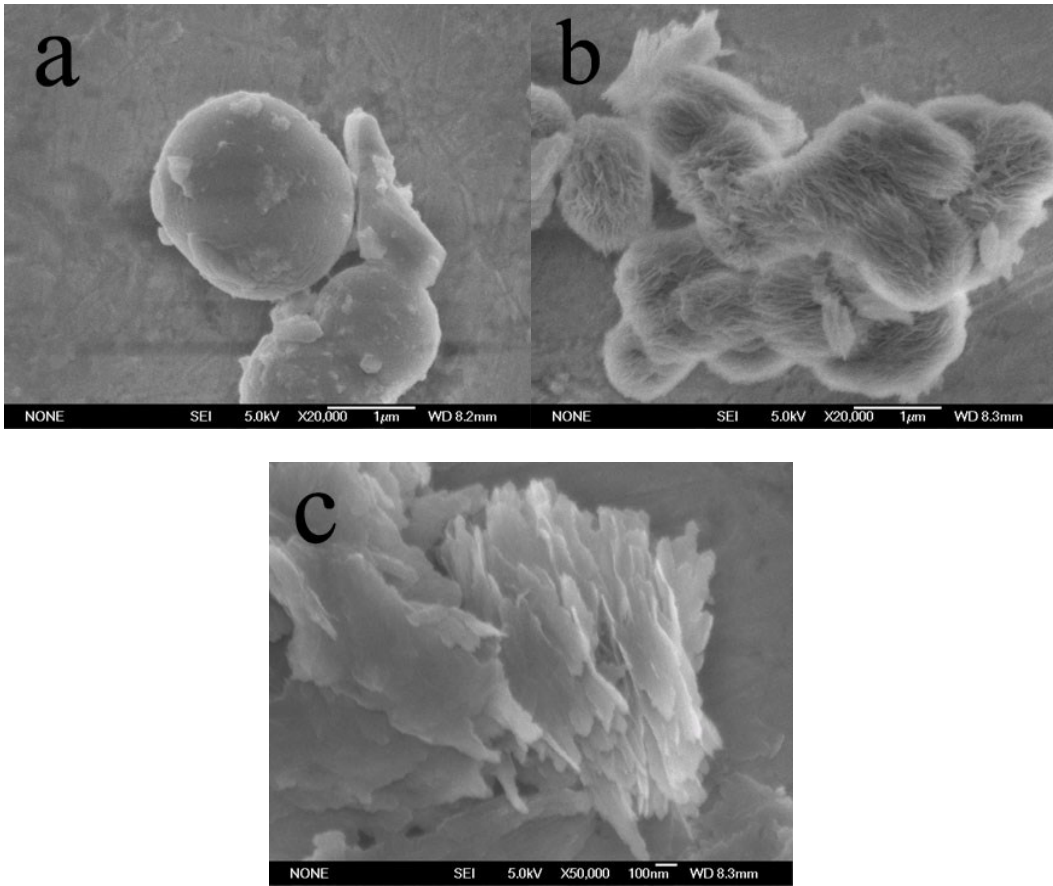

**Fig. S1** SEM images of the hierarchical alumina samples obtained from different precursors at  $R_s=2$ : (a) A-s-2, (b) A-c-2, (c) A-n-2.

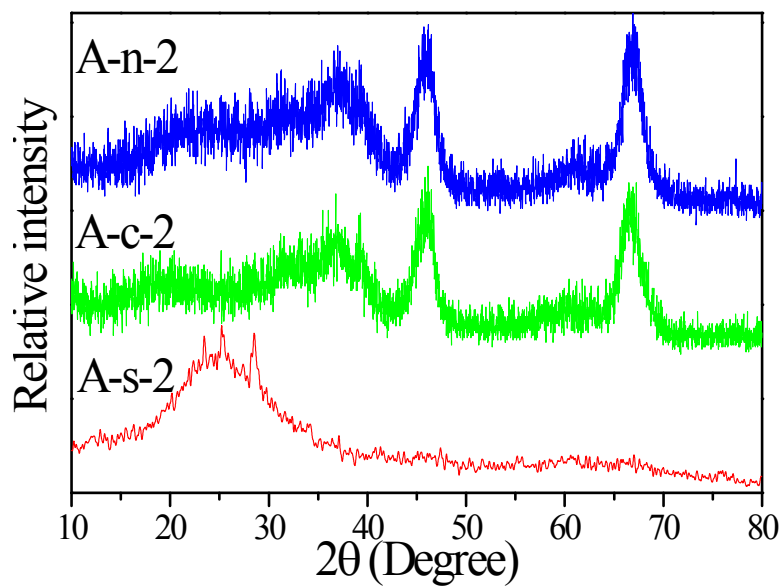

**Fig. S2** XRD patterns of the hierarchical alumina samples after calcination obtained from different aluminum precursors at  $R_s=2$ .

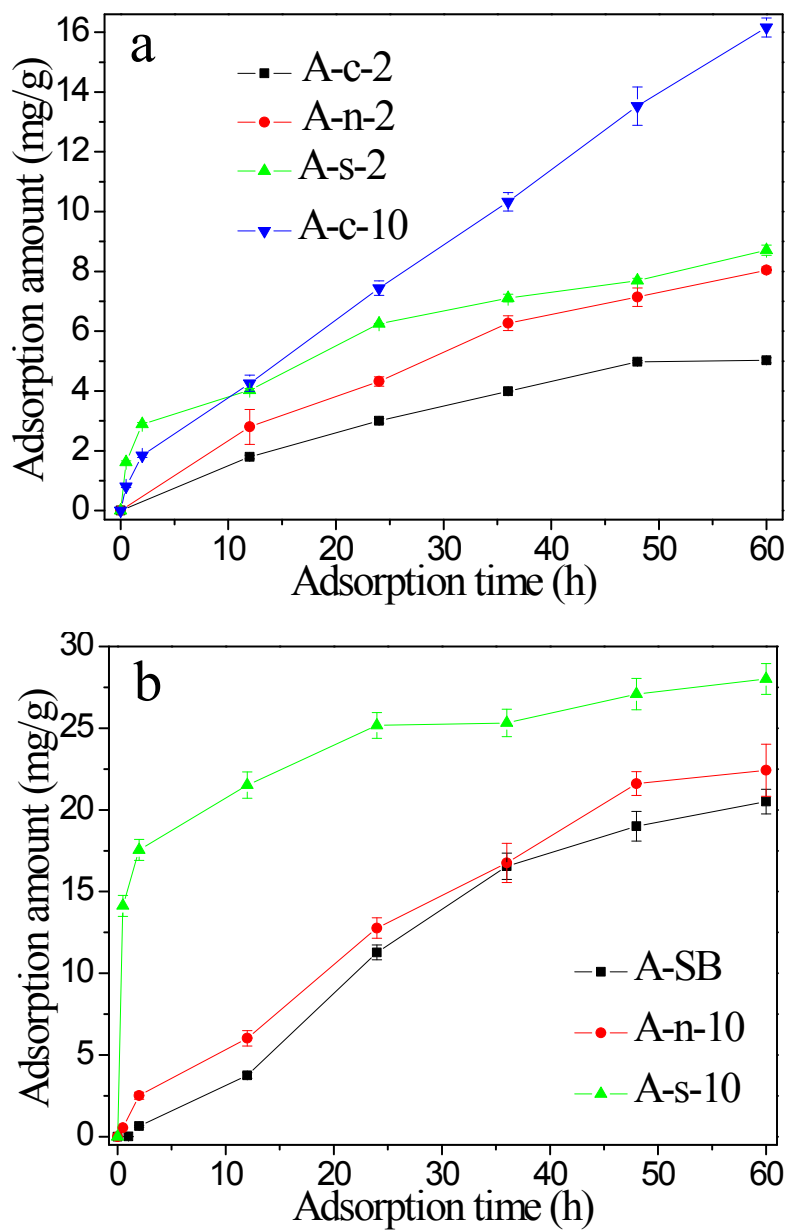

**Fig. S3** Adsorption amounts of phenol with error bars on the hierarchical aluminas prepared from different aluminum precursors at different molar ratio of thiourea to  $\text{Al}^{3+}$ .
